# Supplementary material for: Brain cooling marginally increases acute upper thermal tolerance in Atlantic cod
Source: Oxford University Press journal article supplement (doi:10.1242/jeb.208249), 2019-01-01

**Fig. S1 Blueprints for the construction of brain coolers.** The brain coolers were CNC milled out of solid aluminium blocks according to the blueprints. The water path was drilled with a 1.5 and a 2 mm drill, and the 2 mm drill entry point was plugged. All measurements are in mm.

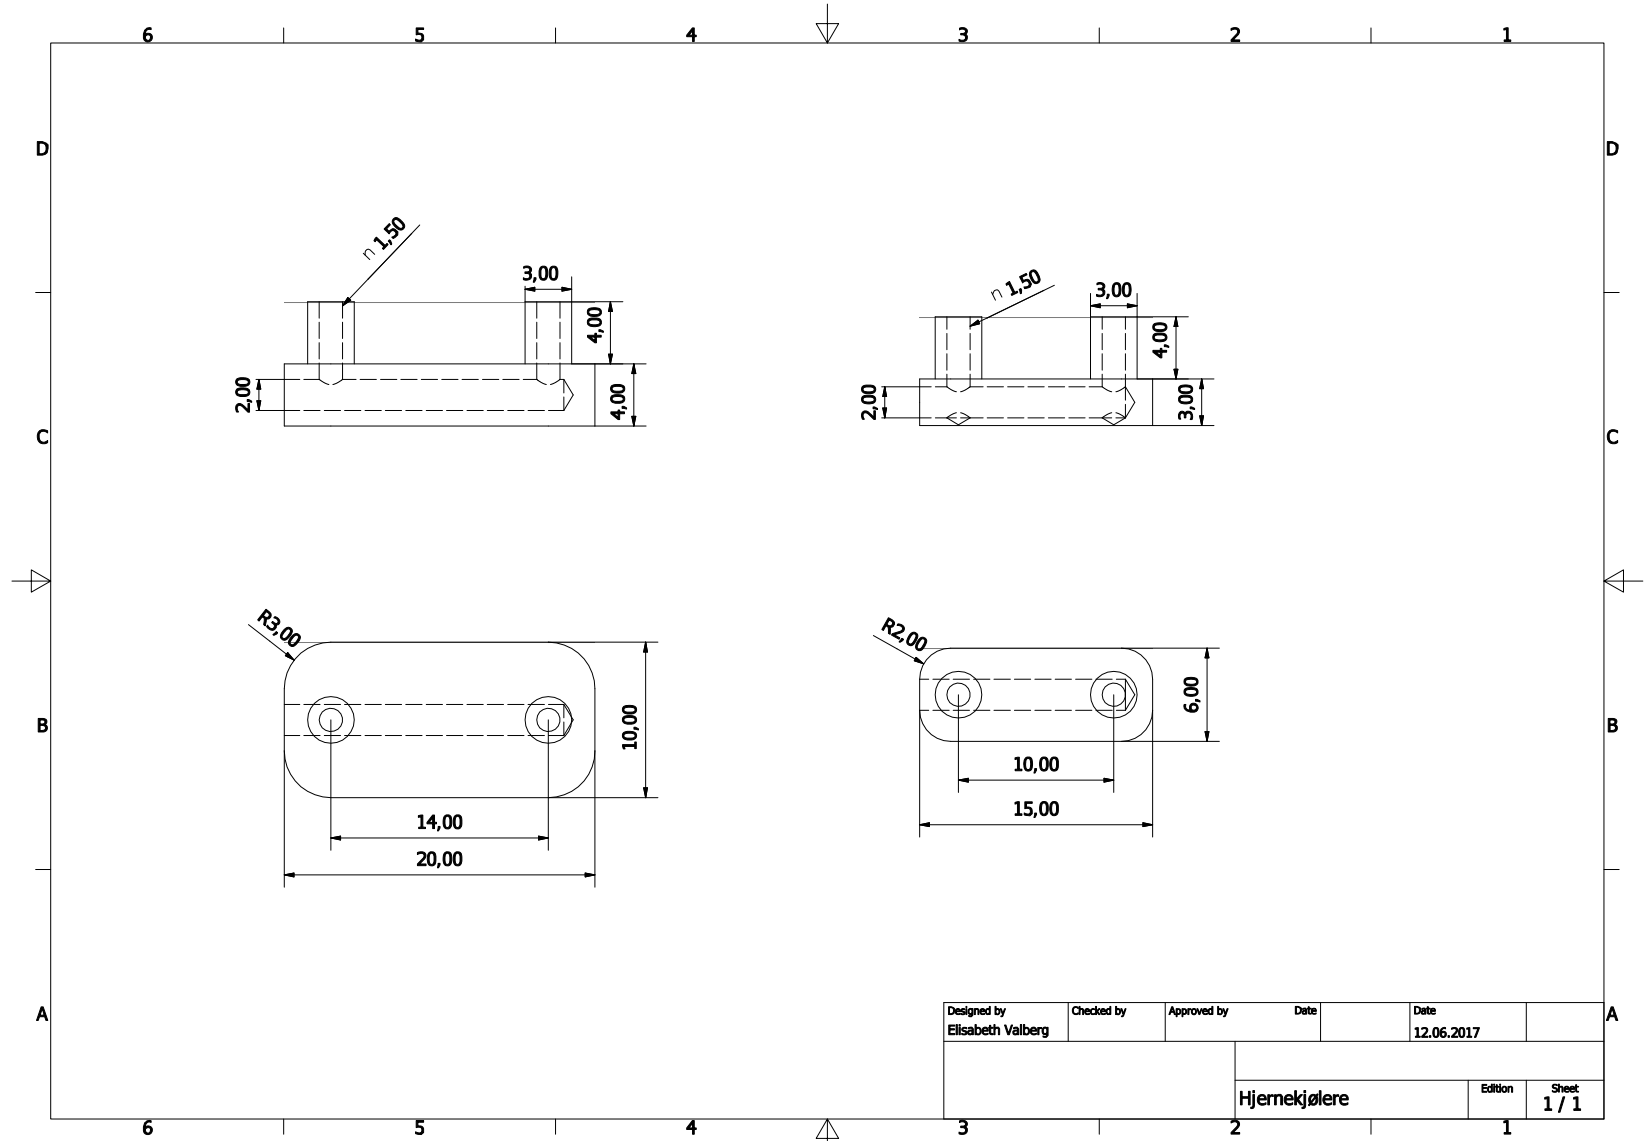

**Fig. S2** Thermal ramping profiles of Atlantic cod subjected to an acute upper thermal tolerance challenge. Note that data are missing for cods 24-27 and the beginning of the trials for cods 21-23 (the thermocouple thermometer was erroneously turned off at the start of these trials). The raw data are available here: <https://doi.org/10.6084/m9.figshare.8199374>

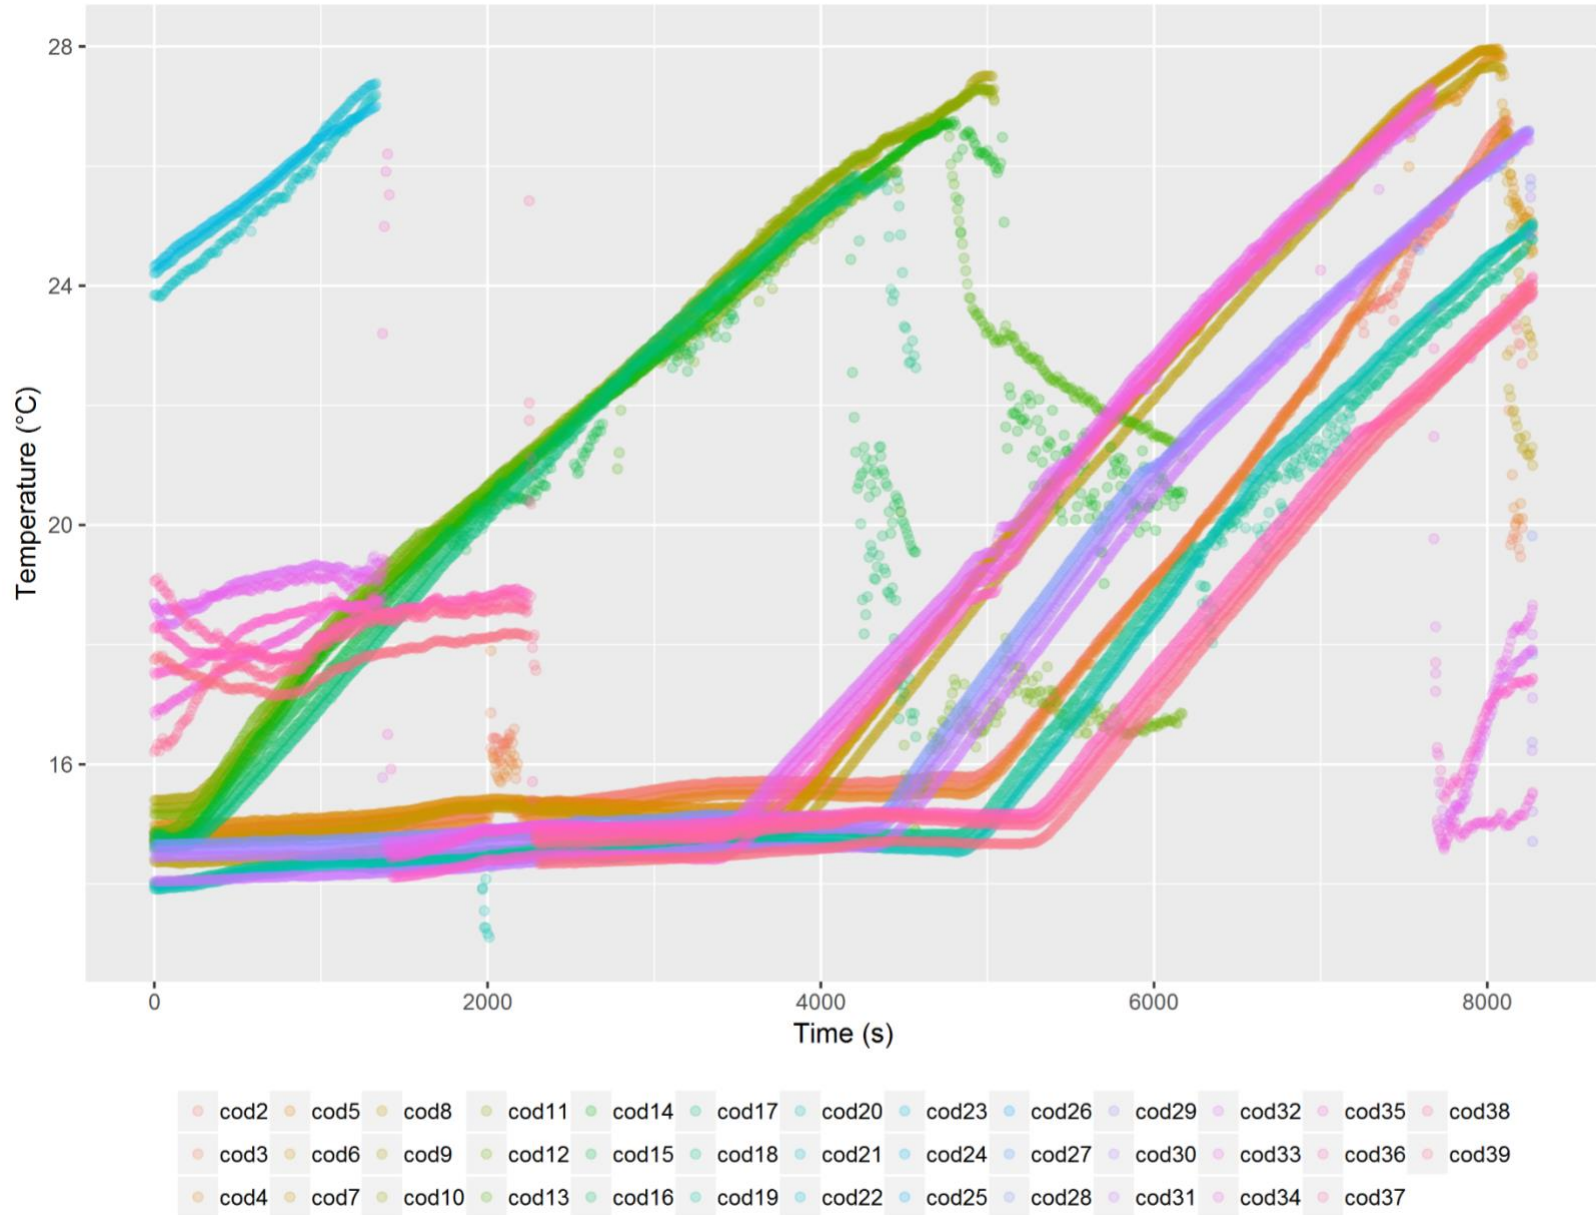

**Fig. S3 Acute upper thermal tolerance of Atlantic cod after removal of two statistical outliers (one in the control group [23.4°C] and one in the instrumented control group [24.7°C]).** (A) Temperatures at loss of equilibrium (LOE, °C) of the control group are shown in blue, the instrumented control group in orange, and the brain-cooled group in red. Vertical bars indicate the standard deviation around the group mean (shown as a gap). (B) Cumming estimation plots (Ho et al., 2018) showing the mean differences in the temperature at LOE among the three groups (i.e., effect sizes; black dots), the distribution of these effect sizes obtained through nonparametric bootstrap resampling (5,000 samples), and their 95% confidence intervals (black bars). Note that raw data for each group appear twice to display pairwise group comparisons corresponding to calculated mean differences.

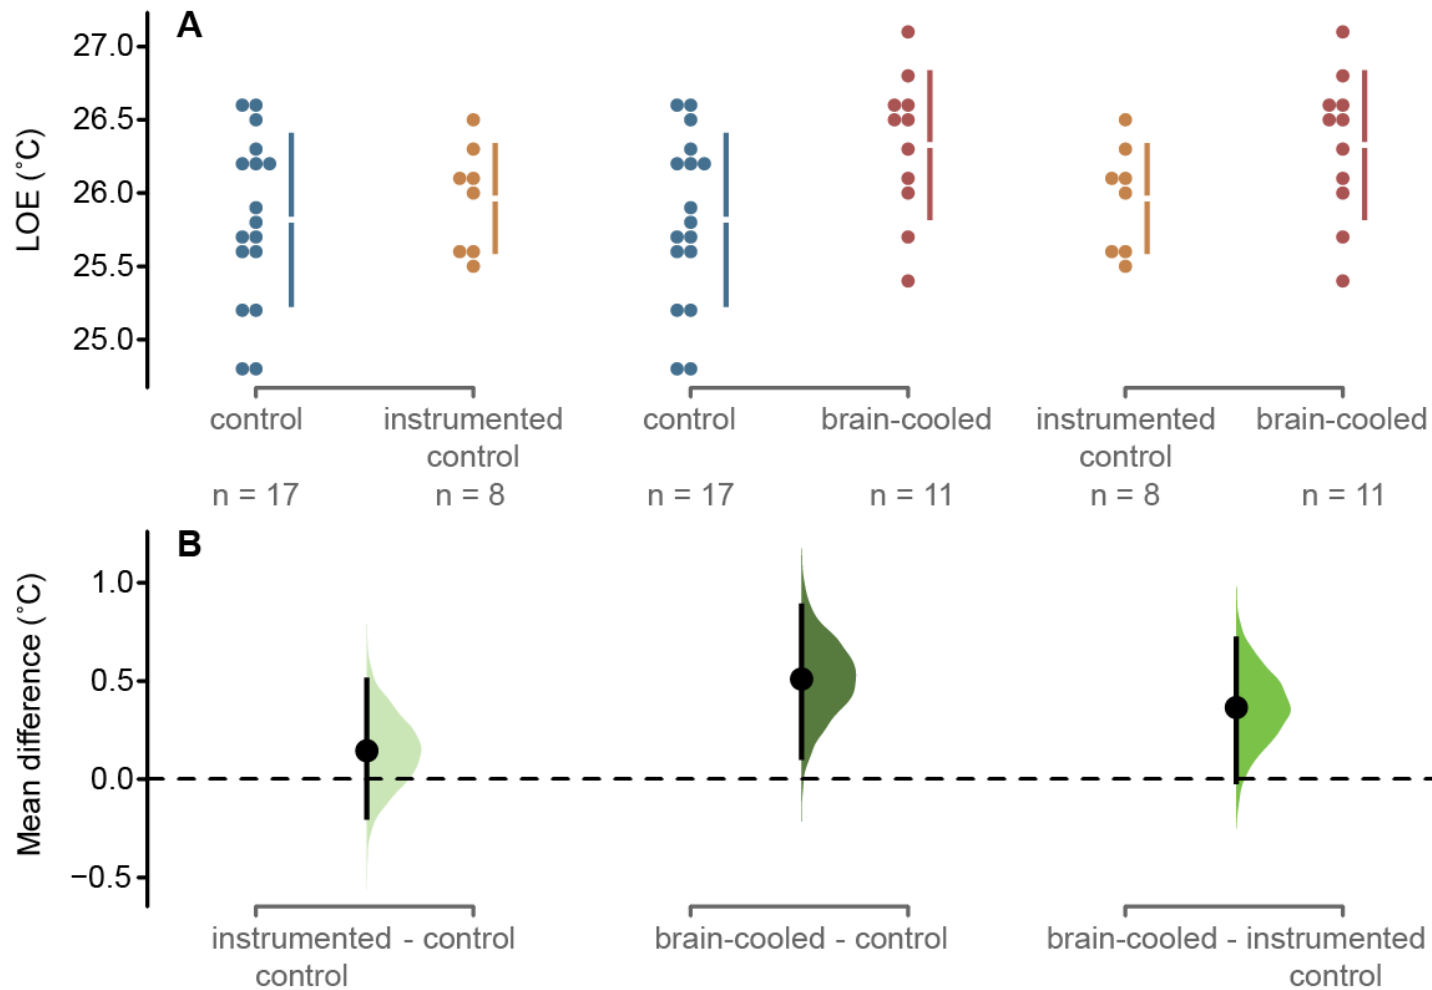

Supplement: jeb208249supp.pdf [file jeb208249supp.pdf]
